# Supplementary material
Source: ML conference proceedings conference paper supplement (https://proceedings.neurips.cc/paper_files/paper/2020/hash/1763ea5a7e72dd7ee64073c2dda7a7a8-Abstract.html)
Supplement: Supplementary file [file 1763ea5a7e72dd7ee64073c2dda7a7a8-Supplemental.pdf]

# Cross-lingual Retrieval for Iterative Self-Supervised Training (supplementary materials)

## 1 Experiment details

In this section, we describe our experimental procedures in more details including hyperparameters, and intermediate results. Because of the file size limit, we will release the source code and pretrained checkpoints after the anonymity period.

### 1.1 Preprocessing details

To be able to make a fair comparison, we followed the same preprocessing steps as described in [13]. We use the same sentence-piece model [10] used in [7] and [13], which is learned on the full Common Crawl data [18] with 250,000 subword tokens. We apply the BPE model directly on raw text for all languages without additional processing.

### 1.2 Mining details

In each iteration, we mine all 90 language pairs in parallel, using 8 GPUs for each pair, each pair taking about 15 – 30 hours to finish. We lightly tune the margin score threshold using validation BLEU (using threshold score between 1.04 and 1.07.) We noticed small variations between different score thresholds in sentence retrieval accuracy and translation quality. The mined bi-text size for English-centric directions at each iteration are reported in Figure 1

### 1.3 Multilingual training details

For all experiments, we use Transformer with 12 layers of encoder and 12 layers of decoder with model dimension of 1024 on 16 heads ( $\sim$  680M parameters).<sup>1</sup> We trained for maximum 20,000 steps using label-smoothed cross-entropy loss with 0.2 label smoothing, 0.3 dropout, 2500 warm-up steps. We sweep for the best maximum learning rate using validation BLEUs, arriving at learning rate of

---

<sup>1</sup>We include an additional layer-normalization layer on top of both the encoder and decoder, which we found stabilized training at FP16 precision.

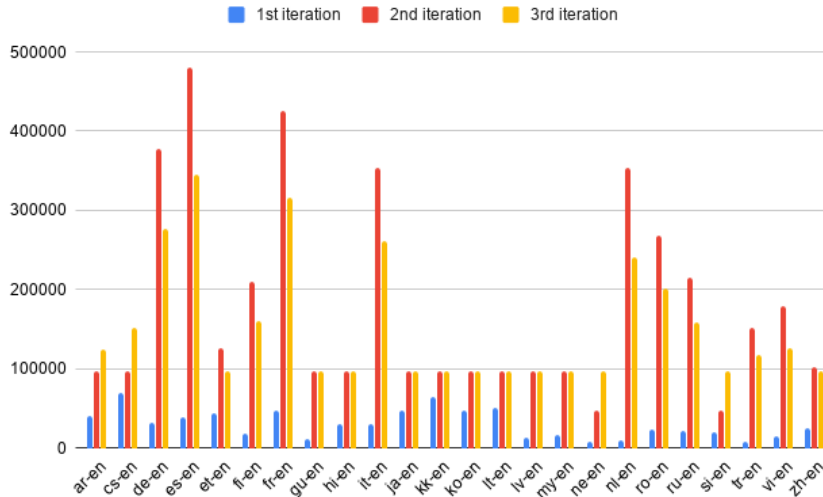

Figure 1: Mined bi-text sizes for English-centric directions at each iteration

$5e-5$  for iteration 1,  $3e-4$  for iteration 2,  $5e-5$  for iteration 3. For all iterations, we train on 16 GPUs using batches of 1024 tokens per GPU.

## 1.4 Evaluation details

For unsupervised machine translation task, we evaluate BLEU scores using multi-bleu.perl<sup>2</sup> to be comparable with previous literature [8], [17], [12], [16]. For supervised machine translation task, we evaluate BLEU scores using sacreBLEU to be comparable with [13]. For both tasks, we compute the BLEU scores over tokenized text for both the reference text and system outputs. We refer readers to [13] for a detailed list of the tokenizers used.

## 2 Supplemented Tables and Figures

### 2.1 Monolingual corpus statistics

In Table 1, we report the statistics of the monolingual data we used for mining stage in CRISS.

### 2.2 Extra unsupervised machine translation results

In Table 3, we report unsupervised machine translation results for language pairs that do not have previous benchmarks. These results are generated using the

<sup>2</sup><https://github.com/moses-smt/mosesdecoder/blob/master/scripts/generic/multi-bleu.perl>

| Language code | Language name        | Data size | Number of sentences |
|---------------|----------------------|-----------|---------------------|
| ar            | Arabic               | 20G       | 100M                |
| cs            | Czech                | 9.6G      | 100M                |
| de            | German               | 11G       | 100M                |
| en            | English              | 9.3G      | 100M                |
| es            | Spanish              | 13G       | 100M                |
| et            | Estonian             | 2.1G      | 21.8M               |
| fi            | Finnish              | 9.8G      | 100M                |
| fr            | French               | 11G       | 100M                |
| gu            | Gujarati             | 747M      | 3.9M                |
| hi            | Hindi                | 11G       | 47M                 |
| it            | Italian              | 13G       | 100M                |
| ja            | Japanese             | 8.6G      | 100M                |
| kk            | Kazakh               | 1.3G      | 7.5M                |
| ko            | Korean               | 8.7G      | 100M                |
| lt            | Lithuanian           | 4.2G      | 38.5M               |
| lv            | Latvian              | 2.1G      | 18.6M               |
| my            | Burmese              | 972M      | 3.3M                |
| ne            | Nepali               | 1.2G      | 4.8M                |
| nl            | Dutch                | 9.9G      | 100M                |
| ro            | Romanian             | 14G       | 100M                |
| ru            | Russian              | 19G       | 100M                |
| si            | Sinhala              | 3.5G      | 20M                 |
| tr            | Turkish              | 9.2G      | 100M                |
| vi            | Vietnamese           | 11G       | 100M                |
| zh            | Chinese (Simplified) | 9.9G      | 100M                |

Table 1: Statistics of monolingual data used for mining

same models that were described in section 5.1

### 2.3 Supervised Machine Translation data source

We use the same supervised machine translation data as described in [13]

| Language code | Language name | Data source |
|---------------|---------------|-------------|
| ar            | Arabic        | IWSLT17 [5] |
| cs            | Czech         | WMT17 [15]  |
| es            | Spanish       | WMT13 [2]   |
| et            | Estonian      | WMT18 [4]   |
| fi            | Finnish       | WMT17 [15]  |
| gu            | Gujarati      | WMT19 [1]   |
| hi            | Hindi         | ITTB [11]   |
| it            | Italian       | IWSLT17 [5] |
| ja            | Japanese      | IWSLT17 [5] |
| kk            | Kazakh        | WMT19 [1]   |
| ko            | Korean        | IWSLT17 [5] |
| lt            | Lithuanian    | WMT19 [1]   |
| lv            | Latvian       | WMT17 [15]  |
| my            | Burmese       | WAT19 [14]  |
| nl            | Dutch         | IWSLT17 [5] |
| ru            | Russian       | WMT16 [3]   |
| tr            | Turkish       | WMT17 [15]  |
| vi            | Vietnamese    | IWSLT15 [6] |

Table 2: Test set used for unsupervised machine translation

| Direction    | en-ar | ar-en | en-cs | cs-en | en-es | es-en | en-et | et-en | en-fi | fi-en |
|--------------|-------|-------|-------|-------|-------|-------|-------|-------|-------|-------|
| CRISS Iter 1 | 7.9   | 20.6  | 11.1  | 19.0  | 26.4  | 27.6  | 11.4  | 17.6  | 12.2  | 17.3  |
| CRISS Iter 2 | 13.9  | 27.0  | 16.4  | 26.4  | 32.5  | 33.4  | 16.5  | 24.2  | 19.0  | 25.3  |
| CRISS Iter 3 | 16.1  | 28.2  | 17.9  | 26.8  | 33.2  | 33.5  | 16.8  | 25.0  | 20.2  | 26.7  |
| Direction    | en-gu | gu-en | en-hi | hi-en | en-it | it-en | en-ja | ja-en | en-kk | kk-en |
| CRISS Iter 1 | 9.7   | 11.2  | 9.2   | 13.6  | 21.1  | 27.2  | 4.9   | 4.6   | 2.9   | 7.4   |
| CRISS Iter 2 | 19.2  | 22.2  | 17.4  | 22.5  | 29.1  | 32.0  | 9.9   | 8.7   | 6.8   | 16.1  |
| CRISS Iter 3 | 22.8  | 23.7  | 19.4  | 23.6  | 29.4  | 32.7  | 10.9  | 8.8   | 6.7   | 14.5  |
| Direction    | en-ko | ko-en | en-lt | lt-en | en-lv | lv-en | en-my | my-en | en-nl | nl-en |
| CRISS Iter 1 | 5.5   | 9.3   | 9.2   | 15.0  | 10.0  | 13.3  | 3.8   | 2.5   | 22.0  | 28.7  |
| CRISS Iter 2 | 12.8  | 15.1  | 14.4  | 21.2  | 13.6  | 18.6  | 9.5   | 4.9   | 29.0  | 34.0  |
| CRISS Iter 3 | 14.0  | 15.4  | 15.2  | 20.8  | 14.4  | 19.2  | 10.4  | 7.0   | 30.0  | 34.8  |
| Direction    | en-ru | ru-en | en-tr | tr-en | en-vi | vi-en |       |       |       |       |
| CRISS Iter 1 | 13.4  | 20.0  | 9.8   | 10.8  | 21.0  | 24.7  |       |       |       |       |
| CRISS Iter 2 | 21.5  | 27.6  | 15.9  | 19.1  | 29.6  | 29.9  |       |       |       |       |
| CRISS Iter 3 | 22.2  | 28.1  | 17.4  | 20.6  | 30.4  | 30.3  |       |       |       |       |

Table 3: Unsupervised machine translation results on language directions without previous benchmarks. Refer to Table 2 for the test data source used for these language pairs.

| Language code | Language name | Data source | Number of sentence pairs |
|---------------|---------------|-------------|--------------------------|
| ar            | Arabic        | IWSLT17 [5] | 250K                     |
| et            | Estonian      | WMT18 [4]   | 1.94M                    |
| fi            | Finnish       | WMT17 [15]  | 2.66M                    |
| gu            | Gujarati      | WMT19 [1]   | 10K                      |
| hi            | Hindi         | ITTB [11]   | 1.56M                    |
| it            | Italian       | IWSLT17 [5] | 250K                     |
| ja            | Japanese      | IWSLT17 [5] | 223K                     |
| kk            | Kazakh        | WMT19 [1]   | 91K                      |
| ko            | Korean        | IWSLT17 [5] | 230K                     |
| lt            | Lithuanian    | WMT19 [1]   | 2.11M                    |
| lv            | Latvian       | WMT17 [15]  | 4.50M                    |
| my            | Burmese       | WAT19 [14]  | 259K                     |
| ne            | Nepali        | FLoRes [9]  | 564K                     |
| nl            | Dutch         | IWSLT17 [5] | 237K                     |
| ro            | Romanian      | WMT16 [3]   | 608K                     |
| si            | Sinhala       | FLoRes [9]  | 647K                     |
| tr            | Turkish       | WMT17 [15]  | 207K                     |
| vi            | Vietnamese    | IWSLT15 [6] | 133K                     |

Table 4: Statistics of data used in supervised machine translation downstream task

## References

- [1] Loïc Barrault, Ondřej Bojar, Marta R Costa-jussà, Christian Federmann, Mark Fishel, Yvette Graham, Barry Haddow, Matthias Huck, Philipp Koehn, Shervin Malmasi, et al. Findings of the 2019 conference on machine translation (wmt19). In *Proceedings of the Fourth Conference on Machine Translation (Volume 2: Shared Task Papers, Day 1)*, pages 1–61, 2019.
- [2] Ondřej Bojar, Christian Buck, Chris Callison-Burch, Christian Federmann, Barry Haddow, Philipp Koehn, Christof Monz, Matt Post, Radu Soricut, and Lucia Specia. Findings of the 2013 Workshop on Statistical Machine Translation. In *Proceedings of the Eighth Workshop on Statistical Machine Translation*, pages 1–44, Sofia, Bulgaria, August 2013. Association for Computational Linguistics.
- [3] Ondřej Bojar, Rajen Chatterjee, Christian Federmann, Yvette Graham, Barry Haddow, Matthias Huck, Antonio Jimeno Yepes, Philipp Koehn, Varvara Logacheva, Christof Monz, et al. Findings of the 2016 conference on machine translation. In *Proceedings of the First Conference on Machine Translation: Volume 2, Shared Task Papers*, pages 131–198, 2016.
- [4] Ondřej Bojar, Christian Federmann, Mark Fishel, Yvette Graham, Barry Haddow, Philipp Koehn, and Christof Monz. Findings of the 2018 conference on machine translation (WMT18). In *Proceedings of the Third Conference on Machine Translation: Shared Task Papers*, pages 272–303, Belgium, Brussels, October 2018. Association for Computational Linguistics.
- [5] Mauro Cettolo, Marcello Federico, Luisa Bentivogli, Niehues Jan, Stüker Sebastian, Sudoh Katsutho, Yoshino Koichiro, and Federmann Christian. Overview of the iwslt 2017 evaluation campaign. In *International Workshop on Spoken Language Translation*, pages 2–14, 2017.
- [6] Mauro Cettolo, Jan Niehues, Sebastian Stüker, Luisa Bentivogli, R. Cattoni, and Marcello Federico. The iwslt 2015 evaluation campaign. 2015.
- [7] Alexis Conneau, Kartikay Khandelwal, Naman Goyal, Vishrav Chaudhary, Guillaume Wenzek, Francisco Guzmán, Edouard Grave, Myle Ott, Luke Zettlemoyer, and Veselin Stoyanov. Unsupervised cross-lingual representation learning at scale. *arXiv preprint arXiv:1911.02116*, 2019.
- [8] Alexis Conneau and Guillaume Lample. Cross-lingual language model pretraining. In *Advances in Neural Information Processing Systems*, pages 7057–7067, 2019.
- [9] Francisco Guzmán, Peng-Jen Chen, Myle Ott, Juan Pino, Guillaume Lample, Philipp Koehn, Vishrav Chaudhary, and Marc’Aurelio Ranzato. The flores evaluation datasets for low-resource machine translation: Nepali–english and sinhala–english. In *Proceedings of the 2019 Conference on Empirical Methods in Natural Language Processing and the 9th International Joint Conference on Natural Language Processing (EMNLP-IJCNLP)*, pages 6100–6113, 2019.
- [10] Taku Kudo and John Richardson. Sentencepiece: A simple and language independent subword tokenizer and detokenizer for neural text processing. In *Proceedings of the 2018 Conference on Empirical Methods in Natural Language Processing: System Demonstrations*, pages 66–71, 2018.
- [11] Anoop Kunchukuttan, Pratik Mehta, and Pushpak Bhattacharyya. The iit bombay english-hindi parallel corpus. In *Proceedings of the Eleventh International Conference on Language Resources and Evaluation (LREC 2018)*, 2018.

- [12] Zuchao Li, Rui Wang, Kehai Chen, Masso Utiyama, Eiichiro Sumita, Zhuosheng Zhang, and Hai Zhao. Data-dependent gaussian prior objective for language generation. In *International Conference on Learning Representations*, 2019.
- [13] Yinhan Liu, Jiatao Gu, Naman Goyal, Xian Li, Sergey Edunov, Marjan Ghazvininejad, Mike Lewis, and Luke Zettlemoyer. Multilingual denoising pre-training for neural machine translation. *arXiv preprint arXiv:2001.08210*, 2020.
- [14] Toshiaki Nakazawa, Nobushige Doi, Shohei Higashiyama, Chenchen Ding, Raj Dabre, Hideya Mino, Isao Goto, Win Pa Pa, Anoop Kunchukuttan, Shantipriya Parida, Ondřej Bojar, and Sadao Kurohashi. Overview of the 6th workshop on Asian translation. In *Proceedings of the 6th Workshop on Asian Translation*, pages 1–35, Hong Kong, China, November 2019. Association for Computational Linguistics.
- [15] Bojar Ondrej, Rajen Chatterjee, Federmann Christian, Graham Yvette, Haddow Barry, Huck Matthias, Koehn Philipp, Liu Qun, Logacheva Varvara, Monz Christof, et al. Findings of the 2017 conference on machine translation (wmt17). In *Second Conference on Machine Translation*, pages 169–214. The Association for Computational Linguistics, 2017.
- [16] Shuo Ren, Yu Wu, Shujie Liu, Ming Zhou, and Shuai Ma. Explicit cross-lingual pre-training for unsupervised machine translation. In *Proceedings of the 2019 Conference on Empirical Methods in Natural Language Processing and the 9th International Joint Conference on Natural Language Processing (EMNLP-IJCNLP)*, pages 770–779, 2019.
- [17] Kaitao Song, Xu Tan, Tao Qin, Jianfeng Lu, and Tie-Yan Liu. Mass: Masked sequence to sequence pre-training for language generation. In *International Conference on Machine Learning*, pages 5926–5936, 2019.
- [18] Guillaume Wenzek, Marie-Anne Lachaux, Alexis Conneau, Vishrav Chaudhary, Francisco Guzman, Armand Joulin, and Edouard Grave. Ccnet: Extracting high quality monolingual datasets from web crawl data. *arXiv preprint arXiv:1911.00359*, 2019.
